# Supplementary material
Source: Springer Nature journal article supplement (http://www.springermedizin.de/resource/supplementary/12872_2011_514_MOESM4_ESM.pdf/9430140)
Supplement: MOESM4 [file 9430140]

A

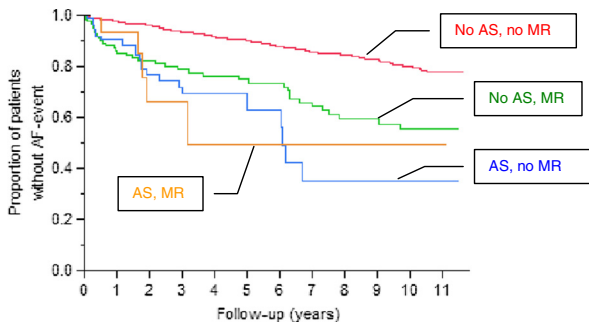

Numbers of patients at risk

|              |     |     |     |     |     |     |
|--------------|-----|-----|-----|-----|-----|-----|
| No AS, no MR | 709 | 683 | 656 | 634 | 617 | 596 |
| No AS, MR    | 129 | 109 | 104 | 102 | 93  | 91  |
| AS, no MR    | 82  | 68  | 65  | 64  | 60  | 60  |
| AS, MR       | 20  | 16  | 15  | 15  | 15  | 15  |

B

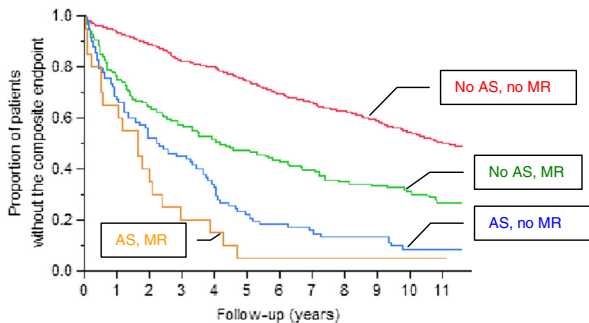

Numbers of patients at risk

|              |     |     |     |     |     |     |
|--------------|-----|-----|-----|-----|-----|-----|
| No AS, no MR | 709 | 631 | 566 | 492 | 444 | 385 |
| No AS, MR    | 129 | 83  | 67  | 56  | 45  | 40  |
| AS, no MR    | 82  | 43  | 28  | 15  | 11  | 7   |
| AS, MR       | 20  | 7   | 3   | 1   | 1   | 1   |
